# Supplementary material for: YAP1 and TAZ negatively control bone angiogenesis by limiting hypoxia-inducible factor signaling in endothelial cells
Source: eLife. 2020 Jan 20;9:e50770. doi: 10.7554/eLife.50770 (PMC6970532; doi:10.7554/eLife.50770)
Supplement: Figure 1—figure supplement 1—source data 1. [file elife-50770-fig1-figsupp1-data1.xlsx]

## Sheet: Figure 1-Figure supplement 1 
	C	Capillary vessel diameter (um)
		brain	heart	liver	spleen	kidney	bone
		4.42	3.03	6.27	6.98	5.68	21.71
		2.68	2.27	8.59	5.63	4.61	10.45
		3.49	2.3	3.9	5.68	7.24	11.04
		3.75	2.76	7.29	6.63	6.96	15.33
		4.32	2.96	6.21	4.23	7.19	22.02
		4.29	2.68	7.61	3.86	6.54	13.93
		3.79	2.68	6.45	2.54	7.28	15.38
		2.68	2.27	6.47	4.61	7.08	13.04
		3.59	3.03	4.23	4.23	7.73	12.23
		2.96	1.89	5.38	8.04	5.36	18.32
		2.43	2.68	8.51	4.56	6.06	15.62
		3.05	3.05	7.77	5.38	6.43	18.24
		3.49	3.79	8.16	4.32	9.22	19.2
		4.58	3.57	5.1	4.32	6.82	14.23
		2.4	3.43	6.78	5.05	5.63	14.2
		3.49	4.18	7.61	3.41	6.98	20.13
		3.05	3.49	4.62	3.24	4.79	15.82
		2.21	3.03	9.04	3.05	5.79	23.14
		2.73	4.17	6.3	3.43	4.1	18.51
		3.59	5.3	5.92	5.36	3.73	17.22
		3.12	3.43	5.15	5.46	5.77	19.66
		2.54	3.03	6.54	2.54	7.28	16.81
		4.42	3.79	5.15	2.88	4.69	22.51
		4.62	4.23	5.32	3.05	5.88	18.87
		3.95	3.95	5.93	4.08	6.44	18.58
		4.92	4.32	6.45	5.42	5.92	12.64
		4.18	3.26	7.55	2.68	5.78	13.72
		4.23	5.78	6.96	2.21	5.63	13.15
		4.92	4.03	5.15	6.63	6.98	14.32
		3.49	3.26	6.27	2.96	4.79	14.06
