# Supplementary material for: YAP1 and TAZ negatively control bone angiogenesis by limiting hypoxia-inducible factor signaling in endothelial cells
Source: eLife. 2020 Jan 20;9:e50770. doi: 10.7554/eLife.50770 (PMC6970532; doi:10.7554/eLife.50770)
Supplement: Figure 1—figure supplement 2—source data 1. [file elife-50770-fig1-figsupp2-data1.xlsx]

## Sheet: Suppl Figure 2
	E	Endothelial marker genes (Fpkm)										I	Endothelial marker genes (Fpkm)
			metaphysis ECs (mp-Ecs)			bone marrow ECs (mp-Ecs)								metaphysis ECs (mp-Ecs)			bone marrow ECs (mp-Ecs)
		gene_name	mpEC-1	mpEC-2	mpEC-3	bmEC-1	bmEC-2	bmEC-3					gene_name	mpEC-1	mpEC-2	mpEC-3	bmEC-1	bmEC-2	bmEC-3
		Pecam1	151.607	169.939	177.71	107.448	114.351	111.166					Aldob	41.0401	49.2748	28.456	581.621	476.347	315.334
		Emcn	186.442	218.165	224.113	127.11	131.607	118.323					Cited2	8.22458	7.63914	6.06969	30.5643	27.6674	17.4411
		Cdh5	148.581	202.764	188.59	164.958	160.076	182.305					Slc16a1	35.1805	36.4806	34.1313	106.059	116.883	110.203
		Apln	23.4386	22.8841	25.8992	1.0419	1.84662	1.34901					Pdk1	8.62461	9.62443	8.00876	24.8999	25.4974	22.9357
		Cd34	464.798	479.905	519.867	33.1028	70.0276	46.9373					Bnip3	12.9702	13.7174	11.1386	26.8784	28.0539	21.7934
		Aplnr	291.147	451.845	402.306	75.4061	106.41	95.3808					Pfkl	31.6722	37.3993	32.9428	53.8597	60.2128	66.3832
		Mcam	42.6875	56.1263	60.0331	14.2917	18.9993	21.8361					Slc2a1	16.0555	22.1318	21.2592	28.8351	35.5018	35.0801
		Efnb2	9.90099	12.4471	15.2177	2.1077	2.61628	2.67221					Bhlhe40 (dec1)	24.7835	25.0564	35.3113	50.805	53.736	34.5866
		Esm1	12.0025	10.8972	15.9595	2.72354	3.73095	3.68689					Bnip3l	114.778	95.5246	90.6739	150.643	155.728	119.79
		Kdr	103.97	145.697	129.377	203.362	193.049	204.942					Pgm1	63.1488	59.6818	62.8592	90.0188	83.4709	82.452
		Flt4	69.7322	84.057	68.8004	160.427	154.211	166.825					Pkm	463.657	467.616	442.806	642.086	569.316	628.72
		Tek	137.797	178.777	170.22	225.109	233.645	222.084					Ets1	195.278	209.225	194.482	253.871	285.374	248.236
		Vegfa	0.0565547	0	0.119934	0.141528	0.22165	0.257276					Aldoa	153.485	144.261	150.163	184.789	180.205	189.541
		Vegfb	1.66398	2.06071	2.11725	2.80131	2.56907	3.12316					Eno1	134.838	107.157	107.206	120.409	119.506	119.583
		Madcam1	7.75103	31.6204	8.26704	91.7361	195.521	142.518					Id2	143.316	164.701	148.95	350.866	367.797	350.077
		Darc	505.916	533.238	391.538	3006.32	2590.04	1989.6
		Sele	44.3836	69.7311	51.0634	239.569	227.793	218.703
	F	Endothelial marker genes (Fpkm)
		Cdh5		Pecam1		Emcn
		mp	bm	mp	bm	mp	bm
		148.581	164.958	151.607	107.448	186.442	131.607
		202.764	160.076	169.939	114.351	218.165	118.323
		188.59	182.305	177.71	111.166	224.113	127.11
	G	Bone marrow Ecs enriched genes (Fpkm)
		Fabp4		Sepp1		Vcam1
		mp	bm	mp	bm	mp	bm
		3377.58	12592.7	2344.75	6190.3	265.392	1149.11
		4427.39	13362	2780.03	6538.04	446.119	1225.79
		3627.42	9909.3	2254.06	4721.89	253.226	944.241
	H	Hypoxia and hypoxia target genes (Fpkm)
		Hif1a		Epas1		Lrg1		Angptl4		Slc2a1		Xbp1
		mp	bm	mp	bm	mp	bm	mp	bm	mp	bm	mp	bm
		44.5965	95.6507	52.5305	78.3709	1755.12	6647.98	68.5416	257.824	16.0555	28.8351	300.522	773.423
		49.6708	104.454	70.9829	75.5365	1804.8	7654.89	91.4718	230.212	22.1318	35.5018	338.014	819.037
		51.1559	83.9662	68.993	92.25	1728.33	6911.48	61.3277	148.487	21.2592	35.0801	305.978	714.787
