# Supplementary material for: YAP1 and TAZ negatively control bone angiogenesis by limiting hypoxia-inducible factor signaling in endothelial cells
Source: eLife. 2020 Jan 20;9:e50770. doi: 10.7554/eLife.50770 (PMC6970532; doi:10.7554/eLife.50770)
Supplement: Figure 1—figure supplement 3—source data 1. [file elife-50770-fig1-figsupp3-data1.xlsx]

## Sheet: Figure 1 -figure supplement 2-S
			metaphysis ECs (mp-Ecs) fpkm			bone marrow ECs (mp-Ecs) fpkm
	E		mpEC-1	mpEC-2	mpEC-3	bmEC-1	bmEC-2	bmEC-3
		Yap1	1.69	2.26	2.13	2.21	1.82	1.99
		Wwtr1 (Taz)	10.1	13.19	14.17	8.69	9.91	7.41
		Lats1	1.685	2.1	1.9	1.94	2.8	1.38
		Lats2	5.71	6.5	6.58	7.2	6.26	5.71
