# Supplementary material for: YAP1 and TAZ negatively control bone angiogenesis by limiting hypoxia-inducible factor signaling in endothelial cells
Source: eLife. 2020 Jan 20;9:e50770. doi: 10.7554/eLife.50770 (PMC6970532; doi:10.7554/eLife.50770)
Supplement: Figure 1—source data 1. [file elife-50770-fig1-data1.xlsx]

## Sheet: Figure 1
	B	Mean intensity (a.u.)								K	Yap1 Mean intensity (a.u.)			Taz Mean intensity (a.u.)
		brain	heat	lung	liver	spleen	kidney	bone			mp	bm		mp	bm
		16.04	20.28	27.62	16.14	30.86	27.9	46.54			74.47	8.48		33.46	23.26
		18.39	16.41	23.62	16.02	35.14	31.12	39.36			74.63	10.83		40.32	23.39
		19.84	17.96	26.32	15.52	28.01	36.13	44.18			75.16	12.02		41.59	23.46
		18.74	16.2	28.23	23.33	28.14	35.65	48.05			75.4	12.52		42.76	23.8
		14.34	17.14	28.06	13.89	23.42	33.16	46.85			75.4	12.55		45.18	24.21
		18.48	19.1	30.14	14.52	25.36	34.52	53.12			75.89	12.86		47.41	24.5
											76.2	17.18		48.67	24.62
											76.33	19.25		49.25	24.78
											76.49	21.44		49.55	24.8
											76.82	22.74		49.85	24.9
	C	Mean intensity (a.u.)			D	Mean intensity (a.u.)					76.91	23.54		50.01	25.04
		mp	dp			mp	dp				77.04	24.93		52.15	25.12
		12.13	48.8			14.6	56.61				78.05	25.71		52.37	25.56
		12.07	41.53			15.67	47.32				78.34	26.27		53.75	25.99
		10.03	32.71			14.08	56.07				78.35	28.81		54.09	26.15
		12.43	54.48			16.18	33.41				79.03	29.49		54.12	26.6
											79.45	30.53		54.73	26.69
		mp (metaphysis)									80.06	31.59		55.25	26.73
		dp (diaphysis)									80.19	33.01		55.7	26.8
											81.12	40.17		56.88	26.89
											82.35	42.92		57.2	26.91
											82.87	44.41		58.1	26.97
	F		metaphysis ECs (mp-Ecs) (Fpkm)			bone marrow ECs (mp-Ecs) (Fpkm)					82.95	46.26		58.14	27.1
		gene_name	mpEC-1	mpEC-2	mpEC-3	bmEC-1	bmEC-2	bmEC-3			83.11	46.38		58.18	27.33
		Lrg1	1755.12	1804.8	1728.33	7654.89	6647.98	6911.48			85.39	48.85		58.22	27.48
		Xbp1	300.522	338.014	305.978	819.037	773.423	714.787			85.99	48.85		58.95	27.79
		Id2	143.316	164.701	148.95	350.866	367.797	350.077			86.49	49.82		59.23	27.83
		Angptl4	68.5416	91.4718	61.3277	257.824	230.212	148.487			87.66	49.88		59.25	27.93
		Ets1	195.278	209.225	194.482	253.871	285.374	248.236			87.91	50.15		59.25	28.15
		Hmox1	36.7386	34.4134	33.5468	94.2439	73.4855	58.0688			89.02	50.77		59.61	28.17
		Trf	16.2593	18.3797	15.8974	78.8937	77.299	70.0218			89.13	52.36		59.62	28.66
		Pfkl	31.6722	37.3993	32.9428	53.8597	60.2128	66.3832			89.75	53.03		59.69	28.74
		Stc1	18.0757	21.6356	46.687	49.5414	59.2614	166.176			90.07	53.66		60.06	28.94
		Slc2a1	16.0555	22.1318	21.2592	28.8351	35.5018	35.0801			90.43	56.44		60.31	29.39
		Bnip3	12.9702	13.7174	11.1386	26.8784	28.0539	21.7934			90.61	58.02		60.4	29.94
		Pdk1	8.62461	9.62443	8.00876	24.8999	25.4974	22.9357			91.25	59.08		60.77	29.96
		Igfbp2	20.5939	20.7288	22.0224	21.9084	33.6014	55.153			91.37	60.79		60.77	30.1
		Vegfa	0.0565547	0.036194	0.119934	0.141528	0.22165	0.257276			91.43	63.27		61.07	30.59
											91.92	63.45		61.32	30.83
											92.71	63.71		61.81	30.85
											92.82	64.01		62.31	30.92
											93.54	66.18		62.49	31.01
											93.67	67.02		62.65	31.11
	G		metaphysis ECs (mp-Ecs) (Fpkm)			bone marrow ECs (mp-Ecs) (Fpkm)					93.78	67.09		63.03	31.13
		gene_name	mpEC-1	mpEC-2	mpEC-3	bmEC-1	bmEC-2	bmEC-3			94.5	68.18		63.41	31.45
		Axl	18.9581	25.2306	15.9179	89.6945	92.1148	75.3216			94.92	70.04		63.82	31.5
		Dusp1	253.172	230.478	309.652	806.999	973.38	270.632			96.65	71.3		63.87	31.52
		Tgm2	24.8691	41.1516	31.0178	72.9677	66.8366	98.7149			97.15	72.35		63.91	31.62
		Tspan3	88.9853	114.03	104.406	211.95	245.718	214.712
		Crim1	5.54832	7.74052	6.44133	10.4591	15.449	10.3738
		Itgb5	0.312935	1.3117	0.459438	1.30118	1.06922	1.38989
		Sdpr	190.108	226.508	196.139	335.224	386.005	317.837
		Etv5	2.34722	2.858	2.55995	4.41284	4.17446	3.85149
		Cyr61	45.972	40.8711	67.6348	112.828	84.613	30.7919
		Ndrg1	24.1083	28.4274	26.3022	37.5441	39.9303	33.0924
		Dab2	81.9216	92.9925	88.3508	123.287	117.993	121.367
