# Supplementary material for: YAP1 and TAZ negatively control bone angiogenesis by limiting hypoxia-inducible factor signaling in endothelial cells
Source: eLife. 2020 Jan 20;9:e50770. doi: 10.7554/eLife.50770 (PMC6970532; doi:10.7554/eLife.50770)
Supplement: Figure 2—figure supplement 1—source data 1. [file elife-50770-fig2-figsupp1-data1.xlsx]

## Sheet: Figure 2 -figure supplment 1
	B	Yap1 (Fold expression)			Taz (Wwtr1)- (Fold expression)			I	total ECs (%)			type H ECs (%)			type L ECs (%)
		Control	Yap1/Taz i△EC		Control	Yap1/Taz i△EC			Control	Yap1/Taz i△EC		Control	Yap1/Taz i△EC		Control	Yap1/Taz i△EC
		1	0.12		1	0.1142			0.36	0.46		0.12	0.17		0.24	0.29
		1.28	0.21		1.3921	0.5358			0.355	0.39		0.095	0.19		0.26	0.26
		1.04	0.2		1.0792	0.2739			0.4	0.44		0.14	0.15		0.26	0.29
		0.98	0.24		1.112	0.275			0.34	0.46		0.13	0.16		0.21	0.29
									0.357	0.64		0.097	0.25		0.26	0.39
									0.35	0.43		0.13	0.17		0.22	0.26
	E	no. of buds (500 um)			no. of columns (1 mm)					0.61			0.25			0.36
		Control	Yap1/Taz i△EC		Control	Yap1/Taz i△EC
		23.3	30		28.33	38
		26.3	34		26	47
		26	33.5		29.5	44
		27	39.5		26	40
		29	37.2		25	32
		25	38.9		29	52
	G	no. of ECs (500 um2)
		Control	Yap1/Taz i△EC
		662	1262
		647	1113
		591	997.5
		796	1049
	H	no. of arteries
		Control	Yap1/Taz i△EC
		6	9
		6	8
		5	12
		4	11
		7	13
		8	11
		7	13
		5	7
