# Supplementary material for: YAP1 and TAZ negatively control bone angiogenesis by limiting hypoxia-inducible factor signaling in endothelial cells
Source: eLife. 2020 Jan 20;9:e50770. doi: 10.7554/eLife.50770 (PMC6970532; doi:10.7554/eLife.50770)
Supplement: Figure 2—source data 1. [file elife-50770-fig2-data1.xlsx]

## Sheet: Sheet1
	B	no. of buds (500 um)			no. of column (1 mm)				H	no. of buds (500 um)			no. of column (1 mm)
		Control	Yap1/Taz i△EC		Control	Yap1/Taz i△EC				Control	Yap1-KIiEC		Control	Yap1-KIiEC
		27	42		35	53				37	19		39.3	26.3
		32	53		42	63				46	17		42	26.3
		36	48		38	54				40	21		45.5	29.5
		35	55		34	48				38	23		42	26.5
		35	51		37	45				33	26		35	32
	D	EdU+ ECs (500 um)							J	column length (um)
		Control	Yap1/Taz i△EC							Control	Yap1-KIiEC
		83	115.5							383	207
		54	107							556	246
		60	97							392	231
		67	109							484	306
		59	110
			96
	F	Column length (um)							L	EdU+ ECs (500 um)
		Control	Yap1/Taz i△EC							Control	Yap1-KIiEC
		453	592							33	16
		368	567							26	13
		314	601							25	15
		408	566							21	18
		334	865
		474	809
