# Supplementary material for: YAP1 and TAZ negatively control bone angiogenesis by limiting hypoxia-inducible factor signaling in endothelial cells
Source: eLife. 2020 Jan 20;9:e50770. doi: 10.7554/eLife.50770 (PMC6970532; doi:10.7554/eLife.50770)
Supplement: Figure 3—figure supplement 1—source data 1. [file elife-50770-fig3-figsupp1-data1.xlsx]

## Sheet: Sheet1
	B	mice body weight (g)			C	femur length (cm)			femur weight (mg)
		Control	Lats2 i△EC			Control	Yap1/Taz i△EC		Control	Yap1/Taz i△EC
		9.71	8.61			1.5	1.1		27	21
		10.31	7.67			1.5	0.9		34	19
		9.87	7.72			1.5	1.2		35	19
		8.13	10.1			1.4	1.3		25	26
		11.59	8.92			1.5	1.2		32	20
		12.28	7.2			1.6	1.1		34	18
		12.48				1.6			35
	G	Emcn+/CD31+ cells
		Control	Lats2 i△EC
		33782	9602
		27109	4376
		36658	14615
		25332	11466
