# Supplementary material for: YAP1 and TAZ negatively control bone angiogenesis by limiting hypoxia-inducible factor signaling in endothelial cells
Source: eLife. 2020 Jan 20;9:e50770. doi: 10.7554/eLife.50770 (PMC6970532; doi:10.7554/eLife.50770)
Supplement: Figure 3—figure supplement 2—source data 1. [file elife-50770-fig3-figsupp2-data1.xlsx]

## Sheet: Sheet1
	E	retina vescular coverage (%)			Branch points (500um2)			Tip cells (500um2)
		Control	Yap1/Taz i△EC		Control	Yap1/Taz i△EC		Control	Yap1/Taz i△EC
		82.52	48.72		273.75	73.25		21	9
		82.52	50.06		291.25	63.5		24	7
		81.71	38.15		236.75	54.25		23	11
		82.94	43.8		237.66	53.75		19	13
		73.71	46.61		258.5	72		21	8
		79.33	52.77			72			5
		no. of ECs (500um2)			Edu + ECs (%)
		Control	Yap1/Taz i△EC		Control	Yap1/Taz i△EC
		381	187		23.6	4.99
		296	168		27.47	14.05
		341	121		24.87	5.2
		339	178		25	8.9
