# Supplementary material for: YAP1 and TAZ negatively control bone angiogenesis by limiting hypoxia-inducible factor signaling in endothelial cells
Source: eLife. 2020 Jan 20;9:e50770. doi: 10.7554/eLife.50770 (PMC6970532; doi:10.7554/eLife.50770)
Supplement: Figure 3—source data 1. [file elife-50770-fig3-data1.xlsx]

## Sheet: Sheet1
	B	Lats2 (Fold expression)				C	femur length (mm)			femur weight (mg)
		Control	Lats2 i△EC				Control	Lats2 i△EC		Control	Lats2 i△EC
		0.73	0.082				1.1	0.6		27	21
		1.14	0.098				1.2	0.5		34	19
		1.19	0.104				1	0.8		35	19
							1	0.9		25	26
							1.1	0.6		32	20
							1.2	0.7		34	18
							1.1			35
	e	no. of buds (500 um)			no. of column (1 mm)
		Control	Lats2 i△EC		Control	Lats2 i△EC
		25	0		36	2
		28	0		35	4
		29	2		39	3
		31	1		43	5
		36	0		46	2
		29	0		39	3
	J	EdU+ ECs (500 um)
		Control	Lats2 i△EC
		19	7
		21	2
		27	5
		17	3
	L	aCasp-3+ ECs (500 um)
		Control	Lats2 i△EC
		3	15
		5	13
		3	11
		4	9
