# Supplementary material for: YAP1 and TAZ negatively control bone angiogenesis by limiting hypoxia-inducible factor signaling in endothelial cells
Source: eLife. 2020 Jan 20;9:e50770. doi: 10.7554/eLife.50770 (PMC6970532; doi:10.7554/eLife.50770)
Supplement: Figure 4—figure supplement 1—source data 1. [file elife-50770-fig4-figsupp1-data1.xlsx]

## Sheet: Sheet1
	B	Differential expression								F		Bone EC marker genes					G		Tip EC enriched genes
			Control			Yap1/Tazi△EC						control		Lats2i△EC					control		Lats2i△EC
		genes	Cont.1	Cont.2	Cont.3	YT.KO1	YT.KO2	YT.KO3				Cont.1	Cont.2	L2-KO1	L2-KO2				Cont.1	Cont.2	L2-KO1	L2-KO2
		Cxcl1	3.10922	3.06266	2.04351	8.12724	14.7847	13.3586			Sepp1	3072.33	2847.02	862.754	581.079			Angpt2	8.06095	8.15448	172.041	478.28
		Stc1	4.69326	4.36677	3.68542	10.8062	21.5759	20.9269			Lrg1	2068.7	2024.3	409.492	402.337			Esm1	5.94216	8.25674	121.927	398.294
		Mir155hg	1.84627	3.70337	0.900888	8.36016	9.26586	7.29137			Apoe	1010.99	879.643	217.717	192.349			Apln	30.5075	41.1044	546.483	992.81
		Enpp6	8.77675	9.39174	10.8487	21.5487	36.211	33.8566			Vcam1	666.106	383.495	79.8449	62.1294			Igfbp3	99.2696	131.366	337.753	595.875
		Apold1	10.8274	11.3318	9.19174	20.8988	33.2771	32.7357			Flt4	114.967	154.521	39.653	35.0402			Cav1	180.963	296.959	932.416	1009.43
		Il1r2	5.85716	4.03861	1.82074	13.517	9.1247	8.59613			Selp	176.523	153.969	55.4764	44.7898			Pdgfb	19.8362	23.1585	69.1895	109.591
		Sox7	2.24613	4.64623	2.60803	6.00165	9.22177	9.70396			Abcc9	97.7967	144.708	23.8662	16.1752			Sox7	38.7577	54.9972	78.49	71.9921
		Irx3	1.52485	1.57712	0.93538	2.55757	3.96143	4.01275			Sele	177.375	134.619	30.3896	14.003			Cav2	58.8775	83.3699	123.142	150.819
		Tiparp	46.4194	40.3933	24.6793	65.7046	120.171	103.205			Cd38	222.851	220.026	80.5235	61.9808			S1pr1	167.405	170.987	248.072	293.183
		Crem	18.5619	16.1656	8.23143	25.6204	44.3632	36.7429			Igfbp2	135.147	133.789	51.9293	50.0275			Cxcr4	5.55805	4.6488	18.4647	43.4406
		Acod1	1.93655	1.83602	1.36117	5.65958	3.73395	3.30308
		Vegfa	19.6711	27.977	17.654	42.8488	55.3945	60.792
		Grasp	10.7244	14.2818	9.67443	26.1852	27.827	29.7767
		Gpr84	2.59441	2.54211	2.19875	3.88651	6.76223	7.07263
		Coq10b	34.949	31.7655	20.2392	49.9357	83.8302	75.8511
		Ell2	11.5487	11.5644	6.67488	19.9395	25.2535	24.6776
		Hes1	27.2224	28.4421	18.6429	33.27	71.2783	66.4904
		Gm7027	5.40172	6.60266	4.14193	12.7291	13.1561	10.2561
		Bbc3	3.5837	5.59614	3.63694	7.60726	10.8676	9.68613		H		Pro-apototic genes
		Adamts1	31.2564	33.7728	22.8343	41.1058	74.1495	76.5357				control		Lats2i△EC
		Itga8	1.22223	1.46478	2.38758	4.43722	3.49655	3.13615				Cont.1	Cont.2	L2-KO1	L2-KO2
		Icam1	113.157	99.0525	68.8129	136.372	232.914	236.126			Tnfrsf9	0.886021	0.802833	8.76042	15.4233
		Cldn5	89.9584	92.6806	71.7329	162.044	194.673	185.944			Cycs	8.08876	8.5927	18.7585	24.6073
		Rabgef1	8.9372	11.4844	6.61925	13.9886	21.9319	21.7202			Bnip3	9.76058	9.20287	12.1657	22.4373
		Upp1	8.74227	10.0466	8.68959	14.5918	22.3437	21.5497			Bcl10	32.5449	33.2381	53.4424	63.5712
		Pmepa1	2.19705	3.29714	1.18917	4.55428	4.75646	4.89456			Bak1	0.667982	0.83806	1.32092	1.33525
		Rgs4	40.3076	34.7646	30.3309	48.0572	88.0767	86.3532			Bax	99.2176	103.685	151.533	183.535
		Traf1	1.50849	2.34029	1.99206	3.79093	4.08221	4.27074			Casp3	20.167	20.3338	34.0525	30.9245
		Tfpi2	5.17164	7.57761	7.93102	11.8284	16.4795	14.5816			Bad	20.7288	22.1119	27.7231	35.4302
		Il1b	56.0476	45.9923	31.9131	79.4246	104.97	92.8121
		Rnf125	15.2311	13.784	11.8006	19.8373	28.9813	35.3897
		Mrpl14	21.6333	18.6072	15.3909	8.3882	8.14776	9.68854
		Sgol1	8.55485	6.16684	5.79298	3.04931	3.20203	3.01654
		Slamf1	2.73738	2.44513	2.4806	1.3913	1.26269	0.779611
		St3gal5	3.63124	4.82876	5.70131	2.98814	1.40382	1.37235
		Mgl2	3.73974	4.32093	6.58764	3.59604	1.1488	0.844393
		Mycn	9.70809	7.00421	8.47923	4.11731	2.60977	2.73925
		Rpsa-ps11	9.99917	6.56629	12.231	4.11415	2.70594	3.38118
		Stfa1	25.8232	15.0125	41.931	12.3529	9.04354	6.76807
		Cd209a	6.41793	5.31033	6.67089	2.60959	1.62101	0.595741
		Col1a1	18.3173	19.2565	25.2718	10.359	2.61812	3.34072
		Jchain	24.2685	16.0095	13.1513	7.35339	2.65224	3.80144
		Col2a1	3.77378	4.59621	1.21696	0.752886	0.37223	0.559823
		Gm3608	4.07302	4.28923	9.88041	0.451671	0.480972	0.556803
		Ighv12-3	54.7369	64.5808	28.9135	9.89177	0.987512	1.01618
		Hist1h2al	99.1056	82.2337	96.171	1.13834	0.454569	0.935533
