# Supplementary material for: YAP1 and TAZ negatively control bone angiogenesis by limiting hypoxia-inducible factor signaling in endothelial cells
Source: eLife. 2020 Jan 20;9:e50770. doi: 10.7554/eLife.50770 (PMC6970532; doi:10.7554/eLife.50770)
Supplement: Figure 4—source data 1. [file elife-50770-fig4-data1.xlsx]

## Sheet: Sheet1
	C	Hypoxia target genes (Fpkm)									E	Yap1/Taz target genes (Fpkm)
			Control			Yap1/Tazi△EC							Control		Lats2i△EC
		genes	Cont.1	Cont.2	Cont.3	YT.KO1	YT.KO2	YT.KO3					Cont.1	Cont.2	Lats2.KO1	Lats2.KO2
		Stc1	4.69326	4.36677	3.68542	10.8062	21.5759	20.9269				Cyr61	28.3432	44.2632	316.037	536.746
		Apold1	10.8274	11.3318	9.19174	20.8988	33.2771	32.7357				Thbs1	9.53104	21.8119	137.516	203.55
		Vegfa	19.6711	27.977	17.654	42.8488	55.3945	60.792				Ddah1	5.39914	5.571	38.8484	65.5618
		Hes1	27.2224	28.4421	18.6429	33.27	71.2783	66.4904				Lhfp	2.09751	3.66823	14.58	24.8707
		Bbc3	3.5837	5.59614	3.63694	7.60726	10.8676	9.68613				Ctgf	68.2809	47.1223	263.843	468.793
		Adamts1	31.2564	33.7728	22.8343	41.1058	74.1495	76.5357
		Ramp3	8.43529	5.92203	5.52722	11.6927	15.066	13.8378
		Angptl4	38.8388	40.4588	25.1384	45.3077	79.325	78.6685
		Bcl2l11	11.5459	12.9777	6.58937	17.9802	21.572	20.3264
		Dll1	4.76574	7.12557	5.92378	9.23001	11.933	10.4774
		Bcl6b	6.31704	6.08229	4.93106	7.63627	10.4418	10.2695			F	Hypoxia target genes (Fpkm)
		Siah2	9.03338	9.44033	7.84656	11.3348	15.7561	15.6829					Control		Lats2i△EC
		Dll4	5.10991	6.55423	4.59228	7.48431	9.1891	9.18047					Cont.1	Cont.2	Lats2.KO1	Lats2.KO2
		Lrg1	206.479	226.195	229.438	246.518	380.665	391.324				Lrg1	2068.7	2024.3	409.492	402.337
		Igfbp2	14.2093	14.0642	10.2803	15.1429	21.9552	21.5396				Xbp1	372.814	333.821	186.479	166.238
		Klf4	27.0028	34.701	22.1956	38.4567	42.1537	46.3351				Angptl4	164.832	162.525	104.901	129.717
		Ramp2	12.5028	14.1471	12.4875	16.4895	21.0815	21.64				Igfbp2	135.147	133.789	51.9293	50.0275
		Atf4	145.11	141.788	147.698	206.036	209.302	216.097				Vegfa	7.77138	7.47898	1.29607	1.02939
		Vgll4	14.6459	20.621	14.9213	21.1867	24.5289	26.7812
		Mcl1	260.902	212.099	203.222	276.449	358.199	333.845
		Slc2a1	20.6234	21.6372	15.131	23.5281	29.8725	28.3228
		Cxcr4	206.615	236.177	177.817	262.269	304.499	314.611
		Xbp1	84.9724	80.8308	94.9348	104.857	130.881	119.274
		Ccnl1	30.9515	25.3812	23.6789	34.4765	35.6147	33.9656
		Angpt1	49.6799	41.2502	43.7371	40.5926	59.106	52.8038			G		Control (Fpkm)		Lats2i△EC (Fpkm)
		Igfbp3	28.8735	20.8879	18.5102	29.4881	24.4291	23.2177					Cont.1	Cont.2	Lats2.KO1	Lats2.KO2
												Ctgf	68.2809	47.1223	263.843	468.793
												Cyr61	28.3432	44.2632	316.037	536.746
												Vegfa	7.77138	7.47898	1.29607	1.02939
	D	Vegfa (Fpkm)				Lrg1 (Fpkm)						Angptl4	164.832	162.525	104.901	129.717
		Control	Yap1/Tazi△EC			Control	Yap1/Tazi△EC
		19.6711	42.8488			206.479	246.518
		27.977	55.3945			226.195	380.665
		17.654	60.792			229.438	391.324
		Angptl4 (Fpkm)				Xbp1 (Fpkm)
		Control	Yap1/Tazi△EC			Control	Yap1/Tazi△EC
		38.8388	45.3077			84.9724	104.857
		40.4588	79.325			80.8308	130.881
		25.1384	78.6685			94.9348	119.274
	H	Ctgf (Fold Expression )					Cyr61 (Fold Expression )					I	Ctgf (Fold Expression )					Cyr61 (Fold Expression )
		Type H Ecs		Type L Ecs			Type H Ecs		Type L Ecs				Type H Ecs		Type L Ecs			Type H Ecs		Type L Ecs
		Control	Yap1/Tazi△EC	Control	Yap1/Tazi△EC		Control	Yap1/Tazi△EC	Control	Yap1/Tazi△EC			Control	Lats2i△EC	Control	Lats2i△EC		Control	Lats2i△EC	Control	Lats2i△EC
		1.38511	0.376312	4.92458	0.243164		1.3566	0.876606	6.06287	0.279322			1.04006	3.90864	16.7567	33.5134		1.53333	2.92141	15.5266	23.0495
		0.806642	0.619854	5.73582	0.289172		0.870551	0.602904	9.98664	0.127627			1.14605	2.03731	10.1027	18.9834		0.997692	3.02444	6.3496	18.2101
		0.895025	0.493116	9.38268	0.196146		0.846745	1.12506	7.31065	0.161544			0.838956	2.52567	12.4379	33.9812		0.653685	2.40605	10.2437	25.223
		Vegfa (Fold Expression )					Angptl4 (Fold Expression )						Vegfa (Fold Expression )					Angptl4 (Fold Expression )
		Type H Ecs		Type L Ecs			Type H Ecs		Type L Ecs				Type H Ecs		Type L Ecs			Type H Ecs		Type L Ecs
		Control	Yap1/Tazi△EC	Control	Yap1/Tazi△EC		Control	Yap1/Tazi△EC	Control	Yap1/Tazi△EC			Control	Lats2i△EC	Control	Lats2i△EC		Control	Lats2i△EC	Control	Lats2i△EC
		1.08925	2.75745	4.23785	10.3627		1.18921	1.75321	4.65893	10.7034			1.50873	0.209255	3.92674	1.44727		1.25992	0.179659	10.4348	0.961483
		0.878633	2.57279	7.27695	9.66878		1.10957	2.47942	6.82108	9.51			0.884745	0.242043	2.4005	0.424352		1.08172	0.490843	11.4188	0.884745
		1.04488	2.59068	3.61334	12.0698		0.757858	1.19748	2.82843	7.6211			0.749154	0.204949	2.99661	1.05214		0.733736	0.215138	5.36409	1.68568
