# Supplementary material for: YAP1 and TAZ negatively control bone angiogenesis by limiting hypoxia-inducible factor signaling in endothelial cells
Source: eLife. 2020 Jan 20;9:e50770. doi: 10.7554/eLife.50770 (PMC6970532; doi:10.7554/eLife.50770)
Supplement: Figure 5—figure supplement 1—source data 1. [file elife-50770-fig5-figsupp1-data1.xlsx]

## Sheet: Sheet1
	A	YAP1 (Fold expression)			TAZ (Fold expression)				HIF1A (Fold expression)
		siControl	siYap1/Taz		siControl	siYap1/Taz			siControl	siHIF1A
		0.92	0.127		1.19	0.2			1	0.06698
		1.01	0.16		0.87	0.28			0.8645	0.068869
		1.08	0.2		1.05	0.26			1	0.04066
		0.81	0.12		1.12	0.27			0.773778	0.04181
	C	XBP1 (Fold expression)
		siControl	siYAP1/TAZ	siHIF1A	siYAP1/TAZ: HIF1A
		0.868541	3.57184	0.601513	0.710382
		0.963707	5.19335	0.681444	0.862542
		1.19472	4.45883	0.355191	0.92445
	D	Ctgf (Fold Expression )					Cyr61 (Fold Expression )					Vegfa (Fold Expression )					Angptl4 (Fold Expression )
		Type H Ecs		Type L Ecs			Type H Ecs		Type L Ecs			Type H Ecs		Type L Ecs			Type H Ecs		Type L Ecs
		Control	Hif1ai△EC	Control	Hif1ai△EC		Control	Hif1ai△EC	Control	Hif1ai△EC		Control	Hif1ai△EC	Control	Hif1ai△EC		Control	Hif1ai△EC	Control	Hif1ai△EC
		1.05946	0.134282	3.74076	1.49831		1.24258	1.34102	4.51064	2.46798		0.946058	0.473029	4.40762	0.0544094		1.12506	0.257028	6.27667	0.238159
		0.872564	0.470848	3.92674	0.825496		0.808508	2.13366	6.33495	2.87454		1	0.692555	3.45815	0.034674		0.773783	0.5	9.84916	0.121582
		1.08172	0.540862	3.58838	0.928731		0.99539	1.15136	3.49026	3.18951		1.05702	0.469761	5.20537	0.0418102		1.1487	0.143587	6.54322	0.134904
