# Supplementary material for: YAP1 and TAZ negatively control bone angiogenesis by limiting hypoxia-inducible factor signaling in endothelial cells
Source: eLife. 2020 Jan 20;9:e50770. doi: 10.7554/eLife.50770 (PMC6970532; doi:10.7554/eLife.50770)
Supplement: Figure 5—source data 1. [file elife-50770-fig5-data1.xlsx]

## Sheet: Sheet1
	A	VEGFA (Fold expression)			Angptl4 (Fold expression)			CTGF (Fold expression)			CYR61 (Fold expression)
		normoxia	Hypoxia		normoxia	Hypoxia		normoxia	Hypoxia		normoxia	Hypoxia
		(21% O2)	(1% O2)		(21% O2)	(1% O2)		(21% O2)	(1% O2)		(21% O2)	(1% O2)
		1	7.56		0.98	6.65		1	2.378		1	2.67
		0.97	6.32		1.01	6.92		0.97	3.03		0.97	3.13
		1.02	6.23		1	7.18		1.02	2.751		1.09	2.98
		0.87	5.97
	C	Ctgf (Fold expression)					Cyr61 (Fold expression)					VEGFA (Fold expression)
		Normoxia		Hypoxia			Normoxia		Hypoxia			Normoxia		Hypoxia
		siControl	siYapTaz	siControl	siYapTaz		siControl	siYapTaz	siControl	siYapTaz		siControl	siYapTaz	siControl	siYapTaz
		1	0.72	4.99	0.547		1	0.59	2.75	0.7		1	2.28	5.5021	11.47
		0.98	0.74	5.06	0.586		0.9726	0.423	3.16	0.51		0.96	2.479	4.9245	12.466
		1	0.295	2.378	0.104		1	0.228	2.67	0.11		1	1.815	11.23	15.88
		0.97	0.2624	3.03	0.179		0.972	0.198	3.13	0.082		1.4	2.751	7.78	21.25
		VEGFA (Fold expression)					ANGPTL4 (Fold expression)					IGFBP2 (Fold expression)
	E	siCont	siYT	siHIF1a	siYT:HIF1a		siCont	siYT	siHIF1a	siYT:HIF1a		siCont	siYT	siHIF1a	siYT:HIF1a
		1.01	4.99	1.94	1.85		1.34723	2.49666	1.09429	0.946058		0.920188	2.39496	1.13288	1.23971
		1.29	2.11	1.42	1.71		0.806642	2.62079	1.16473	0.972655		1.06437	3.55537	1.20581	1.32869
		1.31	4.42	1.31	1.16		0.920188	2.54912	0.376312	1.69349		1.02101	2.42839	0.582367	1.51572
		1.08	4.18	1.05	1.43
	F			siControl	average Ct	% of input				siYAP1/TAZ	average Ct	% of input
		Exp1	Adjuststered input	26.32				Exp1	Adjuststered input	27.15
			IgG	34.73	-8.41	0.293994			IgG	36.73	-9.58	0.130657
			ab HIF1a	30.7	-4.38	4.80273			ab HIF1a	30.48	-3.33	9.94421
		Exp2	Adjuststered input	26.87				Exp2	Adjuststered input	26.85
			IgG	35.14	-8.27	0.323953			IgG	35.42	-8.57	0.263132
			ab HIF1a	30.91	-4.04	6.07909			ab HIF1a	29.71	-2.86	13.7738
		Exp3	Adjuststered input	25.95				Exp3	Adjuststered input	26.5
			IgG	34.04	-8.09	0.367001			IgG	35.72	-9.22	0.167689
			ab HIF1a	30.7	-4.75	3.71627			ab HIF1a	30.31	-3.81	7.12977
