# Supplementary material for: YAP1 and TAZ negatively control bone angiogenesis by limiting hypoxia-inducible factor signaling in endothelial cells
Source: eLife. 2020 Jan 20;9:e50770. doi: 10.7554/eLife.50770 (PMC6970532; doi:10.7554/eLife.50770)
Supplement: Figure 6—source data 1. [file elife-50770-fig6-data1.xlsx]

## Sheet: Sheet1
	B	no. of buds (500 um)			no. of column (1 mm)
		Control	HIF1AdPA iEC		Control	HIF1AdPA iEC
		38	53		27	47
		36	46		23	51
		36	52		30	46
		33	46		31	44
		35	48		27	48
			51			44
	E	column length (um)				no. of column (1 mm)
		Control	Yap1/Taz i△EC	Yap1/Taz:Hif1a i△EC		Control	Yap1/Taz i△EC	Yap1/Taz:Hif1a i△EC
		404	678	364		32	39	34
		386	660	447		34	38	29
		341	591	492		30	36	27
		310	713	511		31	37	33
		413	696	394		29	33	31
		374	493	369		30	35	29
