# Supplementary material for: YAP1 and TAZ negatively control bone angiogenesis by limiting hypoxia-inducible factor signaling in endothelial cells
Source: eLife. 2020 Jan 20;9:e50770. doi: 10.7554/eLife.50770 (PMC6970532; doi:10.7554/eLife.50770)
Supplement: Figure 7—figure supplement 1—source data 1. [file elife-50770-fig7-figsupp1-data1.xlsx]

## Sheet: Sheet1
	A	tibia length (cm)			tibia weight (mg)
		Control	Yap1/Taz i△EC		Control	Yap1/Taz i△EC
		1.3	1.45		25.745	23.405
		1.35	1.35		22.84	24.34
		1.4	1.3		24.08	25.125
		1.35	1.45		25.665	26.3
		1.35	1.3875		24.5825	24.5425
	C	femur weight (mg)
		Control	Yap1-KI iEC
		6.72	3.74
		5.83	4.3
		6.39	4
		6.313	3.94
			5.3
	E	femur length (cm)			femur weight (mg)			tibia length (cm)			tibia weight (mg)
		Control	Yap1-KI iEC		Control	Yap1-KI iEC		Control	Yap1-KI iEC		Control	Yap1-KI iEC
		1	0.7		28	18		1.4	1.2		18	13
		1	0.9		26	19		1.3	1.2		16.3	13
		1	0.8		25	16		1.3	1.1		17	14
		1.1	0.7		26	12		1.4	1		16	14
			0.8			18			1.2			13
	F	no. of Osterix cells
		control	Yap/TaziΔEC-DKO	YT:HIF1a KO
		569	641	517
		441	733	543
		510	594	482
		458	691	578
		491	614	497
		467	572	507
