# Supplementary material for: YAP1 and TAZ negatively control bone angiogenesis by limiting hypoxia-inducible factor signaling in endothelial cells
Source: eLife. 2020 Jan 20;9:e50770. doi: 10.7554/eLife.50770 (PMC6970532; doi:10.7554/eLife.50770)
Supplement: Figure 7—source data 1. [file elife-50770-fig7-data1.xlsx]

## Sheet: Sheet1
	A	mice body weight (g)			C	femur length (cm)			femur weight (mg)
		Control	Yap1/Taz i△EC			Control	Yap1/Taz i△EC		Control	Yap1/Taz i△EC
		8.74	7.87			1	1.1		29.835	31.79
		9.75	8.02			1.05	1.1		32.95	29.85
		9.4	8.55			1.1	1.05		31.15	30.585
		9.3	8.8			1.1	1.15		32.82	33.29
		9.2975	8.31			1.0625	1.1		31.6887	31.3788
	D	no. of Osterix + cells (500um2)			F	no. of Osterix + cells (500um2)
		Control	Yap1/Taz i△EC			Control	Yap1-KI iEC
		442	607			756	415
		437	645			720	589
		502	647			615	389
		347	652			786	385
		431	766			665	441
		445	592			733	358
	I	tb. BV/TV (%)			tb. number (1/mm)			tb. thickness (mm)			tb. separation (mm)
		Control	Yap1/Taz i△EC		Control	Yap1/Taz i△EC		Control	Yap1/Taz i△EC		Control	Yap1/Taz i△EC
		0.187	0.201		7.811	9.277		0.033	0.037		0.171	0.104
		0.174	0.211		5.91	7.178		0.031	0.038		0.147	0.139
		0.198	0.276		6.893	9.708		0.033	0.038		0.188	0.098
		0.118	0.256		5.328	7.816		0.034	0.036		0.159	0.136
		0.169	0.202		6.485	8.816		0.034	0.036		0.143	0.102
